# Supplementary material for: Development of New Iso-Cytoplasmic Rice-Restorer Lines and New Rice Hybrids with Superior Grain Yield and Grain Quality Characteristics by Utilizing Restorers’ Fertility Genes
Source: MDPI journal article supplement (doi:10.3390/genes13050808), 2022-05-01
Supplement: s1 [file s1]

Table S1. Mean performance for the grain yield, floral traits, and its contributing traits of the studied genotypes

| Traits                | PF    | SF    | DH     | PH     | P/P   | PL    | Sp/P   | FG/P   | PW    | 1000  | GY/P  | AL    | AB   | FL   |
|-----------------------|-------|-------|--------|--------|-------|-------|--------|--------|-------|-------|-------|-------|------|------|
| Genotypes             | (%)   | (%)   |        | (cm)   |       | (cm)  |        |        | (g)   | GW    | (g)   |       |      |      |
| G46A*                 | 93.98 | 90.86 | 80.03  | 86.73  | 10.77 | 23.18 | 177.53 | 166.8  | 3.9   | 25.95 | 37.89 | 1.8   | 0.35 | 6.37 |
| IR69625A*             | 93.99 | 90.93 | 99.7   | 102.33 | 14.3  | 21.95 | 135    | 126.63 | 3.79  | 25.21 | 39.07 | 1.83  | 0.38 | 6.17 |
| NRL79                 | 94.81 | 91.09 | 102    | 111.9  | 14.03 | 25.63 | 281.8  | 257.4  | 6.25  | 24.83 | 54.5  | 2.58  | 0.48 | 7.1  |
| NRL80                 | 94.65 | 91.59 | 104    | 119.1  | 15.17 | 25.85 | 238.5  | 220.9  | 6.39  | 24.44 | 51.6  | 2     | 0.46 | 6.94 |
| NRL81                 | 98.09 | 95.44 | 105    | 119.4  | 19.5  | 21.39 | 170.45 | 166.1  | 4.83  | 25.43 | 66.96 | 1.87  | 0.47 | 6.77 |
| NRL82                 | 94.23 | 91.13 | 106.7  | 136.3  | 20.83 | 27.74 | 204.75 | 191.3  | 5.61  | 27.33 | 68.5  | 2.92  | 0.56 | 7.6  |
| Giza 178              | 93.73 | 90.48 | 101.9  | 103.67 | 13.43 | 22.85 | 165.57 | 156.84 | 3.9   | 20.83 | 34.18 | 1.76  | 0.4  | 3.97 |
| G46A ×<br>NRL79       | 94    | 90.83 | 101.02 | 109.33 | 16.43 | 24.47 | 223    | 205.21 | 5.67  | 25.18 | 48.26 | 2.34  | 0.43 | 6.95 |
| IR69A ×<br>NRL79      | 93.99 | 90.16 | 102.4  | 103    | 29    | 24.47 | 198.4  | 179.23 | 4.68  | 24    | 57    | 2.41  | 0.48 | 6.8  |
| G46A ×<br>NRL80       | 91.7  | 88.25 | 102    | 110.17 | 28.13 | 25.28 | 271.17 | 231.53 | 5.1   | 25.43 | 64.63 | 2.01  | 0.43 | 6.92 |
| IR69A ×<br>NRL80      | 98.22 | 95.08 | 103.89 | 106.17 | 13.4  | 22.06 | 138.6  | 135.22 | 3.72  | 25.6  | 44.07 | 2.1   | 0.46 | 6.77 |
| G46A ×<br>NRL81       | 98.02 | 94.93 | 102.01 | 124.17 | 29.83 | 25.6  | 206.2  | 199.39 | 6.18  | 28.18 | 87.14 | 1.86  | 0.42 | 6.97 |
| IR69A ×<br>NRL81      | 96.82 | 91.31 | 104.01 | 102.67 | 13.73 | 23.46 | 165.13 | 153.28 | 4.42  | 26.93 | 47.76 | 1.9   | 0.45 | 6.83 |
| G46A ×<br>NRL82       | 92.56 | 88.46 | 101.01 | 119    | 27.13 | 24.45 | 192.83 | 164.19 | 4.15  | 28.78 | 41.55 | 2.52  | 0.49 | 7.51 |
| IR69A ×<br>NRL82      | 91.57 | 87.35 | 105.7  | 103.33 | 21.5  | 22.53 | 167    | 140.23 | 3.68  | 26.59 | 45    | 2.56  | 0.53 | 7.39 |
| G46A ×<br>Giza 178    | 91.37 | 88.87 | 102.7  | 123.37 | 15.37 | 24.07 | 309.33 | 287.79 | 4.88  | 25.27 | 43.84 | 1.91  | 0.41 | 5.1  |
| IR69A ×<br>Giza 178 ‡ | 93.19 | 89.38 | 101.01 | 106.3  | 18.73 | 22.73 | 158.63 | 154.17 | 4.13  | 23.83 | 38.72 | 1.87  | 0.38 | 4.92 |
| L.S.D. 5%             | 1.93  | 2.13  | 0.86   | 2.6    | 2.22  | 0.8   | 18.18  | 20.21  | 0.71  | 0.84  | 4.83  | 0.42  | 0.05 | 0.58 |
| L.S.D. 1%             | 2.59  | 2.86  | 1.15   | 3.49   | 2.99  | 1.07  | 24.44  | 27.16  | 0.95  | 1.13  | 6.49  | 0.56  | 0.07 | 0.78 |
| CV                    | 1.42  | 1.63  | 0.59   | 1.62   | 8.17  | 2.31  | 6.3    | 7.6    | 10.26 | 2.29  | 6.55  | 13.77 | 7.94 | 6.13 |

\*: The traits were recorded on maintainer lines which were related to CMS lines

‡: Hybrid check

PF : Pollen fertility percentage, SF: Spikelet fertility percentage, HD: Days to 50% heading (day), PH: Plant height (cm), PL: Panicle length (cm), P/P: Number of panicles per plant, Sp/P: Number of spikelets per panicle, FG/P: Number of filled grains per panicle, PW: Panicle weight (g), 1000-GW: 1000-grain weight (g), GY/P: Grain yield per plant (g), AL: Anther length (mm), AB: Anther breadth (mm), and FL: Filament length (mm),

Table S2. Mean performance for the grain quality traits of the studied genotypes

| Traits             | GL   | GW   | GS   | KL   | KW   | KS   | GE     | H<br>(%) | M<br>(%) | HR<br>(%) |
|--------------------|------|------|------|------|------|------|--------|----------|----------|-----------|
| Genotypes          |      |      |      |      |      |      |        |          |          |           |
| G46A*              | 8.4  | 3.08 | 2.72 | 5.03 | 2.67 | 1.89 | 84.18  | 78.12    | 67.23    | 64.95     |
| IR69625A*          | 8.17 | 2.63 | 3.1  | 5.6  | 2.23 | 2.51 | 67.61  | 79.14    | 69.24    | 60.77     |
| NRL79              | 6.95 | 3.05 | 2.28 | 5.13 | 2.75 | 1.87 | 97.17  | 79.73    | 71.28    | 64.01     |
| NRL80              | 7.7  | 3.1  | 2.49 | 5    | 2.52 | 1.99 | 98.7   | 81.77    | 72.11    | 67.75     |
| NRL81              | 7.8  | 3    | 2.6  | 5.3  | 2.63 | 2.01 | 124.32 | 82.8     | 73.82    | 68.58     |
| NRL82              | 7.87 | 3.22 | 2.45 | 5.07 | 2.85 | 1.78 | 119.41 | 81.35    | 71.6     | 67.36     |
| Giza 178           | 7.32 | 2.72 | 2.69 | 4.98 | 2.38 | 2.09 | 80.16  | 81.68    | 71.74    | 68.99     |
| G46A × NRL79       | 7.63 | 3.2  | 2.39 | 5.17 | 2.83 | 1.83 | 58.28  | 78.8     | 69.2     | 58.33     |
| IR69A × NRL79      | 7.55 | 2.9  | 2.6  | 5.38 | 2.56 | 2.1  | 76.16  | 78.47    | 68.27    | 59.27     |
| G46A × NRL80       | 7.47 | 3.18 | 2.35 | 5.2  | 2.63 | 1.98 | 73.14  | 81.53    | 72.6     | 69.73     |
| IR69A × NRL80      | 7.83 | 2.98 | 2.63 | 5.37 | 2.48 | 2.17 | 57.64  | 78.13    | 66       | 60        |
| G46A × NRL81       | 7.67 | 3.38 | 2.27 | 5.42 | 2.85 | 1.9  | 52.98  | 80.07    | 73.33    | 69        |
| IR69A × NRL81      | 7.95 | 3.1  | 2.57 | 5.43 | 2.65 | 2.05 | 71.84  | 80.33    | 73.67    | 57        |
| G46A × NRL82       | 7.73 | 3.2  | 2.42 | 5.43 | 2.68 | 2.02 | 50.48  | 80.87    | 73.73    | 73        |
| IR69A × NRL82      | 7.75 | 3.07 | 2.53 | 5.47 | 2.54 | 2.15 | 59.39  | 79.47    | 69.93    | 53.93     |
| G46A × Giza 178    | 7.62 | 3.15 | 2.42 | 5.41 | 2.69 | 2.01 | 90.8   | 80.01    | 69.32    | 63.3      |
| IR69A × Giza 178 ‡ | 7.81 | 2.77 | 2.82 | 5.55 | 2.48 | 2.24 | 69.09  | 79.42    | 69.4     | 58.44     |
| L.S.D. 5%          | 0.24 | 0.1  | 0.13 | 0.15 | 0.1  | 0.1  | 3.2    | 1.33     | 1.44     | 2.66      |
| L.S.D. 1%          | 0.33 | 0.14 | 0.18 | 0.2  | 0.14 | 0.14 | 4.3    | 1.79     | 1.94     | 3.58      |
| CV                 | 2.19 | 2.38 | 3.57 | 1.93 | 2.69 | 3.56 | 2.84   | 1.15     | 1.42     | 2.9       |

\*: The traits were recorded on maintainer lines which were related to CMS lines

‡: hybrid check

GL: Grain length, GW: Grain width, GS: Grain shape, KL: kernel length, KW: Kernel width, KS: Kernel shape, GE: Grain elongation, H: Hulling percentage, M: Milling percentage and HR: Head rice recovery percentage.

Table S3. Analysis of variance and combining ability for the grain yield, floral traits, and its contributing traits for genotypes studied.

| Source of variance (SOV)     | Replications | Genotypes | Parents  | P. vs. Crosses | Crosses  | Lines     | Tester  | Line × Tester | Error |
|------------------------------|--------------|-----------|----------|----------------|----------|-----------|---------|---------------|-------|
| d.f                          | 2            | 16        | 6        | 1              | 9        | 1         | 4       | 4             | 32    |
| Pollen fertility (%)         | 0.04ns       | 14.60**   | 6.82**   | 5.05ns         | 20.85**  | 11.27ns   | 28.85** | 15.24**       | 1.79  |
| Spikelet fertility (%)       | 3.71ns       | 16.46**   | 8.72**   | 17.37**        | 21.51**  | 1.13ns    | 25.25*  | 22.87**       | 2.19  |
| Days to heading              | 0.004ns      | 101.83**  | 246.10** | 87.99**        | 7.19**   | 20.55**   | 3.30*   | 7.75**        | 0.35  |
| Plant height (cm)            | 0.15ns       | 398.68**  | 746.99** | 4.41ns         | 210.27** | 1250.66** | 77.46** | 82.99**       | 3.25  |
| No. of Panicles/plant        | 3.63ns       | 115.46**  | 37.40**  | 429.03**       | 132.67** | 126.49**  | 44.53** | 222.36**      | 2.39  |
| Panicle length (cm)          | 0.15ns       | 8.57**    | 16.49**  | 0.37ns         | 4.19**   | 22.26**   | 1.78ns  | 2.09**        | 0.31  |
| No. of spikelets/panicle     | 65.4ns       | 7458.7**  | 7442.5** | 464.9ns        | 8246.5** | 41835.7** | 2488.1* | 5607.6**      | 159.3 |
| No. of filled grains/panicle | 42.3ns       | 5768.2**  | 5723.3** | 113.3ns        | 6426.4** | 32314.6** | 2746.8* | 3634.0**      | 194.4 |
| Panicle weight (g)           | 0.1ns        | 2.6**     | 3.9**    | 1.0*           | 2.0**    | 8.6**     | 2.0*    | 0.4ns         | 0.2   |
| 1000 grain weight (g)        | 0.2ns        | 10.0**    | 12.1**   | 15.5**         | 8.0**    | 10.4**    | 14.4**  | 1.1*          | 0.3   |
| Grain Yield/plant (g)        | 1.6ns        | 579.6**   | 584.1**  | 24.6ns         | 638.3**  | 838.8**   | 653.2** | 573.3**       | 11.2  |
| Anther length                | 0.158 ns     | 0.51**    | 0.98**   | 0.19 ns        | 0.24*    | 0.01 ns   | 0.53 ns | 0.004 ns      | 0.083 |
| Anther breadth               | 0.0003 ns    | 0.01**    | 0.02**   | 0.0004ns       | 0.01**   | 0.004 ns  | 0.01*   | 0.001 ns      | 0.001 |
| Filament length              | 0.187 ns     | 2.91**    | 4.17**   | 0.50 ns        | 2.34**   | 0.16 ns   | 5.21**  | 0.001 ns      | 0.16  |

\*\* : Highly significant at 1%      \* : Significant at 5%      ns: Non-significant.

Table S4. Analysis of variance and combining ability for the grain quality traits of genotypes studied.

| Source of variance (SOV) | d.f | GL     | GW     | GS      | KL     | KW      | KS     | GE         | H (%)   | M (%)   | HR (%)   |
|--------------------------|-----|--------|--------|---------|--------|---------|--------|------------|---------|---------|----------|
| Replications             | 2   | 0.04ns | 0.01ns | 0.003ns | 0.03ns | 0.002ns | 0.01ns | 11.88ns    | 0.42ns  | 0.03ns  | 2.65ns   |
| Genotypes                | 34  | 0.31** | 0.11** | 0.13**  | 0.12** | 0.08**  | 0.09** | 1433.74**  | 5.79**  | 17.07** | 88.68**  |
| Parents                  | 12  | 0.72** | 0.14** | 0.21**  | 0.15** | 0.14**  | 0.17** | 1277.47**  | 8.48**  | 13.73** | 26.44**  |
| P. vs. Crosses           | 1   | 0.02ns | 0.18** | 0.18**  | 0.62** | 0.05**  | 0.01ns | 11085.39** | 11.04** | 2.58ns  | 183.86** |
| Crosses                  | 21  | 0.06ns | 0.09** | 0.08**  | 0.04** | 0.05**  | 0.05** | 465.52**   | 3.42**  | 20.91** | 119.60** |
| Lines                    | 1   | 0.18ns | 0.50** | 0.51**  | 0.10*  | 0.28**  | 0.29** | 21.29ns    | 8.93*   | 35.69** | 600.05** |
| Tester                   | 10  | 0.04ns | 0.07*  | 0.03ns  | 0.06ns | 0.04*   | 0.03ns | 497.49**   | 2.43ns  | 24.93** | 34.01*   |
| Line × Tester            | 10  | 0.05ns | 0.01ns | 0.02ns  | 0.01ns | 0.004ns | 0.01ns | 544.61**   | 3.03*   | 13.20** | 85.06**  |
| Error                    | 68  | 0.03   | 0.01   | 0.01    | 0.01   | 0.005   | 0.01   | 4.94       | 0.85    | 1.01    | 3.42     |

GL: Grain length, GW: Grain width, GS: Grain shape, KL: Kernel length, KW: Kernel width, KS: Kernel shape, GE: Grain elongation, H: Hulling percentage, M: Milling percentage and HR: Head rice recovery percentage.

Table S5. Estimates of variability parameters for the grain yield, floral traits, grain quality, and their contributing traits in promising restorer lines of rice.

| Crosses               | GCV   | PCV   | GA    | Heritability | GA%   |
|-----------------------|-------|-------|-------|--------------|-------|
| Traits                | (%)   | (%)   |       | (%)          |       |
| Days to heading       | 1.94  | 2     | 4.04  | 94.12        | 3.89  |
| Plant height          | 10.18 | 10.24 | 24.63 | 98.84        | 20.86 |
| No. of Panicles/plant | 19.31 | 21.92 | 5.81  | 77.61        | 35.04 |
| Panicle length        | 10.18 | 10.48 | 5.04  | 94.48        | 20.39 |

|                              |       |       |       |       |       |
|------------------------------|-------|-------|-------|-------|-------|
| Pollen fertility %           | 1.73  | 1.96  | 2.98  | 77.59 | 3.14  |
| No. of spikelets/panicle     | 22.18 | 24.48 | 87.86 | 82.08 | 41.4  |
| Spikelet fertility (%)       | 2.1   | 2.29  | 3.64  | 83.8  | 3.96  |
| No. of filled Grains/panicle | 19.49 | 23.16 | 67.06 | 70.82 | 33.78 |
| Panicle weight               | 18.98 | 19.74 | 2.03  | 92.41 | 37.58 |
| 1000- grain weight           | 9.56  | 9.78  | 4.73  | 95.53 | 19.24 |
| Grain yield (gm/P)           | 24.9  | 25.68 | 27.44 | 94.05 | 49.75 |
| Anther length (mm)           | 29.93 | 36.02 | 1.08  | 69.05 | 51.23 |
| Anther breadth (mm)          | 11.54 | 13.11 | 0.1   | 77.46 | 20.92 |
| Filament Length (mm)         | 21.36 | 23.74 | 2.56  | 80.91 | 39.57 |
| Hulling (%)                  | 1.27  | 1.54  | 1.75  | 67.71 | 2.15  |
| Milling (%)                  | 1.31  | 1.52  | 1.69  | 74.73 | 2.34  |
| Head rice (%)                | 2.78  | 3.2   | 3.34  | 75.18 | 4.96  |
| Grain length                 | 5.03  | 5.34  | 0.73  | 88.55 | 9.74  |
| Grain width                  | 5.86  | 6.73  | 0.32  | 76.01 | 10.53 |
| Grain types                  | 6.1   | 6.5   | 0.3   | 88.09 | 11.79 |
| Grain (kernel) length        | 2.33  | 2.78  | 0.21  | 70.42 | 4.03  |
| Grain (kernel) width         | 6.68  | 7.69  | 0.31  | 75.56 | 11.96 |
| Grain elongation             | 17.2  | 17.48 | 36.26 | 96.85 | 34.88 |
| Grain (kernel) types         | 6.14  | 6.78  | 0.22  | 81.87 | 11.44 |

---

(PCV%): Phenotypic Coefficient of Variation, (GCV%): Genotypic Coefficient of Variation GA: Genetic Advance and GA%: Genetic Advance

Table S6. Estimates of the percentage of heterosis over better-parent (BP) for grain yield, its contributing and floral traits of studied hybrids.

| Traits             |        |        |        |         |         |         |         |         |         |             |          |         |         |             |
|--------------------|--------|--------|--------|---------|---------|---------|---------|---------|---------|-------------|----------|---------|---------|-------------|
| crosses            | PF (%) | SF (%) | DH     | PH (cm) | P/P     | PL (cm) | Sp/P    | FG/P    | PW (g)  | 1000 GW (g) | GY/P (g) | AL      | AB      | FL          |
| G46A × NRL79       | -0.9ns | -0.3ns | 26.2** | 26.1**  | 17.1ns  | -4.5*   | -20.9** | -20.3** | -9.3ns  | -3.0ns      | -11.4*   | -9.4ns  | -10.4ns | -<br>2.1ns  |
| IR69A × NRL79      | -0.9ns | -1.0ns | 2.7**  | 0.7ns   | 102.8** | -4.5*   | -29.6** | -30.4** | -25.1** | -4.8*       | 4.6ns    | -6.7ns  | 0.0ns   | -<br>4.2ns  |
| G46A × NRL80       | -3.1*  | -3.6** | 27.4** | 27.0**  | 85.5**  | -2.2ns  | 13.7**  | 4.8ns   | -20.1** | -2.0ns      | 25.3**   | 0.3ns   | -6.5ns  | -<br>0.3ns  |
| IR69A × NRL80      | 3.8**  | 3.8**  | 4.2**  | 3.7*    | -11.6ns | -14.7** | -41.9** | -38.8** | -41.8** | 1.5ns       | -14.6**  | 4.8ns   | 0.0ns   | -<br>2.4ns  |
| G46A × NRL81       | -0.1ns | -0.5ns | 27.5** | 43.2**  | 53.0**  | 10.4**  | 16.1**  | 19.5**  | 28.0**  | 8.6**       | 30.1**   | -0.4ns  | -10.6ns | 3.0ns       |
| IR69A × NRL81      | -1.3ns | -4.3** | 4.3**  | 0.3ns   | -29.6** | 6.9**   | -3.1ns  | -7.7ns  | -8.4ns  | 5.9**       | -28.7**  | 1.8ns   | -4.3ns  | 0.9ns       |
| G46A × NRL82       | -1.8ns | -2.9*  | 26.2** | 37.2**  | 30.2**  | -11.8** | -5.8ns  | -14.2*  | -26.0** | 5.3**       | -39.3**  | -13.8ns | -12.5*  | -<br>1.2ns  |
| IR69A × NRL82      | -2.8*  | -4.2** | 6.0**  | 1.0ns   | 3.2ns   | -18.8** | -18.4** | -26.7** | -34.4** | -2.7ns      | -34.3**  | -12.4ns | -5.4ns  | -<br>2.8ns  |
| G46A × Giza 178    | -2.8*  | -2.2ns | 28.3** | 42.2**  | 14.4ns  | 3.8ns   | 74.2**  | 72.5**  | 25.1*   | -2.6ns      | 15.7*    | 6.3ns   | 2.5ns   | -<br>19.9** |
| IR69A × Giza 178 ‡ | -0.9ns | -1.7ns | 1.3*   | 3.9*    | 31.0**  | -0.5ns  | -4.2ns  | -1.7ns  | 5.9ns   | -5.4**      | -0.9ns   | 2.4ns   | -5.0ns  | -<br>20.2** |
| L.S.D. 5%          | 2.2    | 2.5    | 1.0    | 3.0     | 2.6     | 0.9     | 21.0    | 23.3    | 0.8     | 1.0         | 5.6      | 0.5     | 0.1     | 0.7         |
| L.S.D. 1%          | 3      | 3.3    | 1.3    | 4       | 3.5     | 1.2     | 28.2    | 31.4    | 1.1     | 1.3         | 7.5      | 0.6     | 0.1     | 0.9         |

\*: The traits were recorded on maintainer lines which were related to CMS lines

‡: Hybrid check

PF : Pollen fertility percentage, SF: Spikelet fertility percentage, HD: Days to 50% heading (day), PH: Plant height (cm), PL: Panicle length (cm), P/P: Number of panicles per plant, Sp/P: Number of spikelets per panicle, FG/P: Number of filled grains per panicle, PW: Panicle weight (g), 1000-GW: 1000-grain weight (g), GY/P: Grain yield per plant (g), AL: Anther length (mm), AB: Anther breadth (mm), and FL: Filament length (mm),

Table S7. Estimates of the percentage of heterosis over better-parent (BP) for grain quality traits of studied hybrids.

| Traits             | Grain length | Grain width | Grain types | Kernel length | Kernel width | Kernel types | Grain elongation | Hulling (%) | Milling (%) | Head rice (%) |
|--------------------|--------------|-------------|-------------|---------------|--------------|--------------|------------------|-------------|-------------|---------------|
| Crosses            |              |             |             |               |              |              |                  |             |             |               |
| G46A × NRL79       | 9.8**        | 3.8ns       | 4.5ns       | 2.6ns         | 2.8ns        | -2.3ns       | -40.0**          | -1.2ns      | -2.9*       | -10.2**       |
| IR69A × NRL79      | 8.6**        | -4.9*       | 14.0**      | 4.9**         | -6.9**       | 12.5**       | -21.6**          | -1.6ns      | -4.2**      | -7.4**        |
| G46A × NRL80       | -3.0ns       | 2.7ns       | -5.6ns      | 4.0*          | -1.3ns       | 4.8ns        | -25.9**          | -0.3ns      | 0.7ns       | 2.9ns         |
| IR69A × NRL80      | 1.7ns        | -3.8ns      | 5.6ns       | 7.3**         | -1.6ns       | 9.1**        | -41.6**          | -4.5**      | -8.5**      | -11.4**       |
| G46A × NRL81       | -1.7ns       | 9.7**       | -12.7**     | 7.6**         | 6.9**        | 0.9ns        | -57.4**          | -3.3**      | -0.7ns      | 0.6ns         |
| IR69A × NRL81      | 1.9ns        | 3.3ns       | -1.3ns      | 2.5ns         | 0.6ns        | 2.0ns        | -42.2**          | -3.0**      | -0.2ns      | -16.9**       |
| G46A × NRL82       | -1.7ns       | -0.5ns      | -1.2ns      | 7.9**         | -5.8**       | 13.9**       | -57.7**          | -0.6ns      | 3.0*        | 8.4**         |
| IR69A × NRL82      | -1.5ns       | -4.7*       | 3.4ns       | 7.9**         | -10.9**      | 21.2**       | -50.3**          | -2.3*       | -2.3*       | -19.9**       |
| G46A × Giza 178    | 4.1*         | 2.1ns       | -10.1**     | 8.6**         | 0.9ns        | 6.5*         | 7.9**            | -2.0*       | -3.4**      | -8.2**        |
| IR69A × Giza 178 ‡ | 6.7**        | 2.0ns       | 4.6ns       | 11.4**        | 4.2ns        | 7.2*         | -13.8**          | -2.8**      | -3.3**      | -15.3**       |
| L.S.D. 5%          | 0.3          | 0.1         | 0.2         | 0.2           | 0.1          | 0.1          | 3.7              | 1.5         | 1.7         | 3.1           |
| L.S.D. 1%          | 0.4          | 0.2         | 0.2         | 0.2           | 0.2          | 0.2          | 5                | 2.1         | 2.2         | 4.1           |



\*: The traits were recorded on maintainer lines which were related to CMS lines ‡: Hybrid check.

Table S8. Estimates of the percentage of heterosis over mid-parents (MP) for grain yield, its contributing and floral traits of studied hybrids.

| Traits          | PF (%) | SF (%) | DH     | PH (cm) | P/P     | PL (cm) | Sp/P    | FG/P    | PW (g)  | 1000 GW (g) | GY/P (g) | AL    | AB     | FL         |
|-----------------|--------|--------|--------|---------|---------|---------|---------|---------|---------|-------------|----------|-------|--------|------------|
| Crosses         |        |        |        |         |         |         |         |         |         |             |          |       |        |            |
| G46A × NRL79    | -0.4ns | -0.2ns | 11.0** | 10.1**  | 32.5**  | 0.3ns   | -2.9ns  | -3.3ns  | 11.7ns  | -0.8ns      | 4.5ns    | 6.8ns | 4.0ns  | 3.2ns      |
| IR69A × NRL79   | -0.4ns | -0.9ns | 1.5**  | -3.8**  | 104.7** | 2.8ns   | -4.8ns  | -6.7ns  | -6.7ns  | -4.1*       | 21.8**   | 9.2ns | 11.6ns | 2.5ns      |
| G46A × NRL80    | -2.8** | -3.3** | 10.8** | 7.0**   | 117.0** | 3.1ns   | 30.4**  | 19.4**  | -0.8ns  | 0.9ns       | 44.4**   | 5.7ns | 6.6ns  | 4.0ns      |
| IR69A × NRL80   | 4.1**  | 4.2**  | 2.0**  | -4.1**  | -9.0ns  | -7.7**  | -25.8** | -22.2** | -26.9** | 3.1ns       | -2.8ns   | 9.6ns | 9.5ns  | 3.3ns      |
| G46A × NRL81    | 2.1*   | 1.9ns  | 10.3** | 20.5**  | 97.1**  | 14.9**  | 18.5**  | 19.8**  | 41.6**  | 9.7**       | 66.2**   | 1.5ns | 2.9ns  | 6.1ns      |
| IR69A × NRL81   | 0.8ns  | -2.0ns | 1.6**  | -7.4**  | -18.7** | 8.3**   | 8.1ns   | 4.7ns   | 2.6ns   | 6.4**       | -9.9*    | 2.8ns | 5.9ns  | 5.6ns      |
| G46A × NRL82    | -1.6ns | -2.8*  | 8.2**  | 6.7**   | 71.7**  | -4.0*   | 0.9ns   | -8.3ns  | -12.7ns | 8.0**       | -21.9**  | 6.7ns | 8.1ns  | 7.5ns      |
| IR69A × NRL82   | -2.7*  | -4.0** | 2.4**  | -13.4** | 22.4**  | -9.3**  | -1.7ns  | -11.8ns | -21.7** | 1.2ns       | -16.3**  | 7.7ns | 12.8*  | 7.4ns      |
| G46A × Giza 178 | -2.7*  | -2.0ns | 12.9** | 29.6**  | 27.0**  | 4.6*    | 80.3**  | 77.8**  | 25.2**  | 8.0**       | 21.7**   | 7.5ns | 9.8ns  | -<br>1.3ns |
| IR69A × Giza    | -0.7ns | -1.5ns | 0.2ns  | 3.2*    | 35.1**  | 1.5ns   | 5.6ns   | 8.8ns   | 7.5ns   | 3.5ns       | 5.7ns    | 4.4ns | -2.6ns | -          |

|           |      |      |      |      |      |      |       |       |      |      |      |      |      |       |
|-----------|------|------|------|------|------|------|-------|-------|------|------|------|------|------|-------|
| 178 ‡     |      |      |      |      |      |      |       |       |      |      |      |      |      | 2.9ns |
| L.S.D. 5% | 1.93 | 2.13 | 0.86 | 2.60 | 2.22 | 0.80 | 18.18 | 20.21 | 0.71 | 0.84 | 4.83 | 0.42 | 0.05 | 0.58  |
| L.S.D. 1% | 2.59 | 2.86 | 1.15 | 3.49 | 2.99 | 1.07 | 24.44 | 27.16 | 0.95 | 1.13 | 6.49 | 0.56 | 0.07 | 0.78  |

\*: The traits were recorded on maintainer lines which were related to CMS lines ‡: Hybrid check.

PF : Pollen fertility percentage, SF: Spikelet fertility percentage, HD: Days to 50% heading (day), PH: Plant height (cm), PL: Panicle length (cm), P/P: Number of panicles per plant, Sp/P: Number of spikelets per panicle, FG/P: Number of filled grains per panicle, PW: Panicle weight (g), 1000-GW: 1000-grain weight (g), GY/P: Grain yield per plant (g), AL: Anther length (mm), AB: Anther breadth (mm), and FL: Filament length (mm),

Table S9. Estimates of the percentage of heterosis over mid-parents (MP) for grain quality traits of studied hybrids.

| Traits        | Grain length | Grain width | Grain types | Kernel length | Kernel width | Kernel types | Grain elongation | Hulling (%) | Milling (%) | Head rice (%) |
|---------------|--------------|-------------|-------------|---------------|--------------|--------------|------------------|-------------|-------------|---------------|
| Crosses       |              |             |             |               |              |              |                  |             |             |               |
| G46A × NRL79  | -0.5ns       | 4.3*        | -4.7ns      | 1.6ns         | 4.4*         | -2.8ns       | -35.7**          | -0.2ns      | -0.1ns      | -9.5**        |
| IR69A × NRL79 | -0.1ns       | 2.1ns       | -3.3ns      | 0.3ns         | 2.7ns        | -3.9ns       | -7.6**           | -1.2ns      | -2.8**      | -5.0*         |
| G46A × NRL80  | -7.2**       | 3.0ns       | -9.9**      | 3.7*          | 1.6ns        | 2.1ns        | -20.0**          | 2.0*        | 4.2**       | 5.1*          |
| IR69A × NRL80 | -1.3ns       | 4.1*        | -6.0*       | 1.3ns         | 4.3*         | -3.6ns       | -30.7**          | -2.9**      | -6.6**      | -6.6**        |
| G46A × NRL81  | -5.3**       | 11.2**      | -14.7**     | 4.8**         | 7.5**        | -2.4ns       | -49.2**          | -0.5ns      | 4.0**       | 3.4ns         |

|                       |        |        |         |        |        |        |         |        |        |         |
|-----------------------|--------|--------|---------|--------|--------|--------|---------|--------|--------|---------|
| IR69A ×<br>NRL81      | -0.4ns | 10.1** | -10.0** | -0.3ns | 8.9**  | -9.1** | -25.1** | -0.8ns | 3.0**  | -11.9** |
| G46A ×<br>NRL82       | -4.9** | 1.6ns  | -6.5*   | 7.6**  | -2.7ns | 10.5** | -50.4** | 1.4ns  | 6.2**  | 10.3**  |
| IR69A ×<br>NRL82      | -3.3*  | 4.8**  | -8.8**  | 2.5ns  | -0.1ns | 0.5ns  | -36.5** | -1.0ns | -0.7ns | -15.8** |
| G46A ×<br>Giza 178    | -3.0ns | 8.5**  | -10.6** | 8.0**  | 6.5**  | 1.1ns  | 10.5**  | 0.1ns  | -0.2ns | -5.5**  |
| IR69A ×<br>Giza 178 ‡ | 0.8ns  | 3.6ns  | -2.8ns  | 4.9**  | 7.6**  | -2.5ns | -6.5**  | -1.2ns | -1.5ns | -9.9**  |
| L.S.D. 5%             | 0.24   | 0.10   | 0.13    | 0.15   | 0.10   | 0.10   | 3.20    | 1.33   | 1.44   | 2.66    |
| L.S.D. 1%             | 0.33   | 0.14   | 0.18    | 0.2    | 0.14   | 0.14   | 4.3     | 1.79   | 1.94   | 3.58    |

\*: The traits were recorded on maintainer lines which were related to CMS lines ‡: Hybrid check.

Table S10. Estimates of the percentage of standard heterosis (SH) for grain yield, its contributing and floral traits of studied hybrids.

| Traits           | PF (%) | SF (%) | DH     | PH (cm) | P/P     | PL (cm) | Sp/P   | FG/P   | PW (g) | 1000 GW (g) | GY/P (g) | AL     | AB     | FL     |
|------------------|--------|--------|--------|---------|---------|---------|--------|--------|--------|-------------|----------|--------|--------|--------|
| Crosses          |        |        |        |         |         |         |        |        |        |             |          |        |        |        |
| G46A ×<br>NRL79  | 0.9ns  | 1.6ns  | 0.01ns | 2.9*    | -12.3ns | 7.6**   | 40.6** | 33.1** | 37.2** | 5.7**       | 24.6**   | 24.9ns | 13.2ns | 41.3** |
| IR69A ×<br>NRL79 | 0.9ns  | 0.9ns  | 1.4**  | -3.1*   | 54.8**  | 7.6**   | 25.1** | 16.3*  | 13.2ns | 0.7ns       | 47.2**   | 28.6*  | 26.3** | 38.2** |
| G46A ×<br>NRL80  | -1.6ns | -1.3ns | 1.0*   | 3.6*    | 50.2**  | 11.2**  | 70.9** | 50.2** | 23.4*  | 6.7**       | 66.9**   | 7.3ns  | 13.2ns | 40.7** |

|                       |        |        |         |        |         |        |         |         |         |        |         |        |        |        |
|-----------------------|--------|--------|---------|--------|---------|--------|---------|---------|---------|--------|---------|--------|--------|--------|
| IR69A ×<br>NRL80      | 5.40** | 6.4**  | 2.9**   | -0.1ns | -28.5** | -3.0ns | -12.6ns | -12.3ns | -10.0ns | 7.4**  | 13.8ns  | 12.1ns | 21.1** | 37.6** |
| G46A ×<br>NRL81       | 5.2**  | 6.2**  | 1.0*    | 16.8** | 59.3**  | 12.6** | 30.0**  | 29.3**  | 49.5**  | 18.2** | 125.1** | -0.7ns | 10.5ns | 41.7** |
| IR69A ×<br>NRL81      | 3.9**  | 2.2ns  | 3.0**   | -3.4*  | -26.7** | 3.2ns  | 4.1ns   | -0.6ns  | 6.9ns   | 13.0** | 23.4**  | 1.4ns  | 18.4*  | 38.8** |
| G46A ×<br>NRL82       | -0.7ns | -1.0ns | 0.003ns | 11.9** | 44.8**  | 7.6**  | 21.6**  | 6.5ns   | 0.4ns   | 20.8** | 7.3ns   | 34.5** | 28.9** | 52.6** |
| IR69A ×<br>NRL82      | -1.7ns | -2.3ns | 4.6**   | -2.8ns | 14.8*   | -0.9ns | 5.3ns   | -9.0ns  | -11.0ns | 11.6** | 16.2*   | 36.7** | 39.5** | 50.2** |
| G46A ×<br>Giza 178    | -2.0ns | -0.6ns | 1.7**   | 16.1** | -18.0*  | 5.9**  | 95.0**  | 86.7**  | 18.1ns  | 6.0**  | 13.2ns  | 2.1ns  | 7.9ns  | 3.7ns  |
| IR69A ×<br>Giza 178 ‡ | 0.0ns  | 0.00ns | 0.0ns   | 0.0ns  | 0.0ns   | 0.0ns  | 0.0ns   | 0.0ns   | 0.0ns   | 0.0ns  | 0.0ns   | 0.0ns  | 0.0ns  | 0.0ns  |
| L.S.D 5%              | 2.2    | 2.5    | 1       | 3.0    | 2.6     | 0.9    | 21.0    | 23.3    | 0.8     | 1.0    | 5.6     | 0.5    | 0.1    | 0.7    |
| L.S.D 1%              | 3      | 3.3    | 1.3     | 4      | 3.5     | 1.2    | 28.2    | 31.4    | 1.1     | 1.3    | 7.5     | 0.6    | 0.1    | 0.9    |

\*: The traits were recorded on maintainer lines which were related to CMS lines ‡: Hybrid check.

PF: Pollen fertility percentage, SF: Spikelet fertility percentage, HD: Days to 50% heading (day), PH: Plant height (cm), PL: Panicle length (cm), P/P: number of panicles per plant, Sp/P: Number of spikelets per panicle, FG/P: Number of filled grains per panicle, PW: Panicle weight (g), 1000-GW: 1000-grain weight (g), GY/P: Grain yield per plant (g), AL: Anther length (mm), AB: Anther breadth (mm), and FL: Filament length (mm),

Table S11. Estimates of the percentage of standard heterosis (SH) for grain quality traits of studied hybrids.

| Traits | Grain | Grain | Grain | Kernel | Kernel | Kernel | Grain | Hulling (%) | Milling (%) | Head rice (%) |
|--------|-------|-------|-------|--------|--------|--------|-------|-------------|-------------|---------------|
|--------|-------|-------|-------|--------|--------|--------|-------|-------------|-------------|---------------|

| Crosses               | length | width  | types   | length | width  | types   | elongation |        |        |        |
|-----------------------|--------|--------|---------|--------|--------|---------|------------|--------|--------|--------|
| G46A ×<br>NRL79       | -2.2ns | 15.5** | -15.3** | -6.9** | 13.8** | -18.5** | -15.6**    | -0.8ns | -0.3ns | -0.2ns |
| IR69A ×<br>NRL79      | -3.3ns | 4.7*   | -7.6**  | -3.0ns | 3.1ns  | -6.1*   | 10.2**     | -1.2ns | -1.6ns | 1.4ns  |
| G46A ×<br>NRL80       | -4.4*  | 14.9** | -16.7** | -6.3** | 6.0*   | -11.8** | 5.9*       | 2.7**  | 4.6**  | 19.3** |
| IR69A ×<br>NRL80      | 0.3ns  | 7.7**  | -6.7*   | -3.3*  | -0.3ns | -3.3ns  | -16.6**    | -1.6ns | -4.9** | 2.7ns  |
| G46A ×<br>NRL81       | -1.8ns | 22.1** | -19.4** | -2.4ns | 14.8** | -15.0** | -23.3**    | 0.8ns  | 5.7**  | 18.1** |
| IR69A ×<br>NRL81      | 1.8ns  | 11.9** | -8.9**  | -2.1ns | 6.7**  | -8.3**  | 4.0ns      | 1.1ns  | 6.2**  | -2.5ns |
| G46A ×<br>NRL82       | -0.9ns | 15.5** | -14.2** | -2.1ns | 8.1**  | -9.7**  | -26.9**    | 1.8ns  | 6.2**  | 24.9** |
| IR69A ×<br>NRL82      | -0.7ns | 10.7** | -10.2** | -1.5ns | 2.3ns  | -3.9ns  | -14.0**    | 0.1ns  | 0.8ns  | -7.7** |
| G46A ×<br>Giza 178    | -2.4ns | 13.6** | -14.1** | -2.5ns | 8.3**  | -10.3** | 31.4**     | 0.7ns  | -0.1ns | 8.3**  |
| IR69A ×<br>Giza 178 ‡ | 0.0ns  | 0.0ns  | 0.0ns   | 0.0ns  | 0.0ns  | 0.0ns   | 0.0ns      | 0.0ns  | 0.0ns  | 0.0ns  |
| L.S.D 5%              | 0.3    | 0.1    | 0.2     | 0.2    | 0.1    | 0.1     | 3.7        | 1.5    | 1.7    | 3.1    |
| L.S.D 1%              | 0.4    | 0.2    | 0.2     | 0.2    | 0.2    | 0.2     | 5          | 2.1    | 2.2    | 4.1    |

\*: The traits were recorded on maintainer lines which were related to CMS lines ‡: Hybrid check.
